# Supplementary material for: IBM1, a JmjC domain-containing histone demethylase, is involved in the regulation of RNA-directed DNA methylation through the epigenetic control of RDR2 and DCL3 expression in Arabidopsis
Source: PubMed Central journal article supplement — Nucleic Acids Res. 2012 Jul 5;40(18):8905–16. doi: 10.1093/nar/gks647 (PMC3467047; doi:10.1093/nar/gks647), 2012-07-05
Supplement: supp_gks647_nar-02781-m-2011-File008.pdf [file supp_gks647_nar-02781-m-2011-File008.pdf]

**Supplementary Materials:**

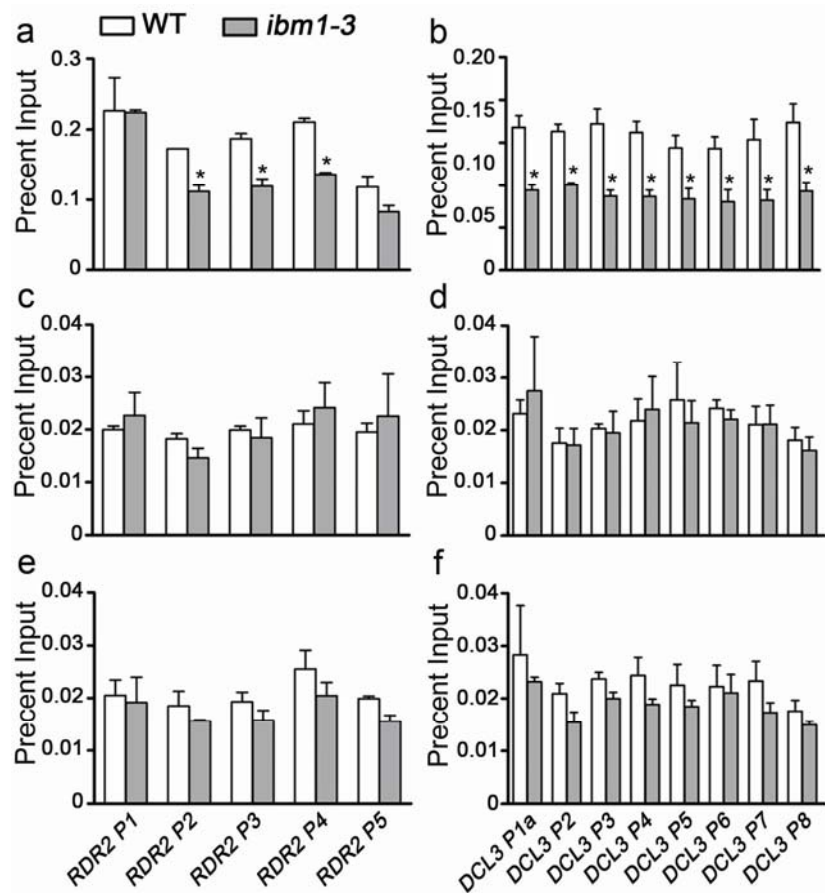

**Supplementary Figure 1.** IBM1 affects the association of Pol II with *RDR2* and *DCL3* chromatin. The association of the total Pol II ([a] and [b]), the CTD serine 2 phosphorylated Pol II ([c] and [d]), and the CTD serine 5 phosphorylated Pol II ([e] and [f]), with the chromatin of *RDR2* and *DCL3* were analyzed by ChIP. Ten-day-old plants were used for ChIP, and the enrichments were normalized to the input. All results are shown as the mean value  $\pm$  S.E. of three biological replicates. WT: wild-type. Asterisks indicate the significant difference using Student's *t* test ( $p < 0.05$ ).

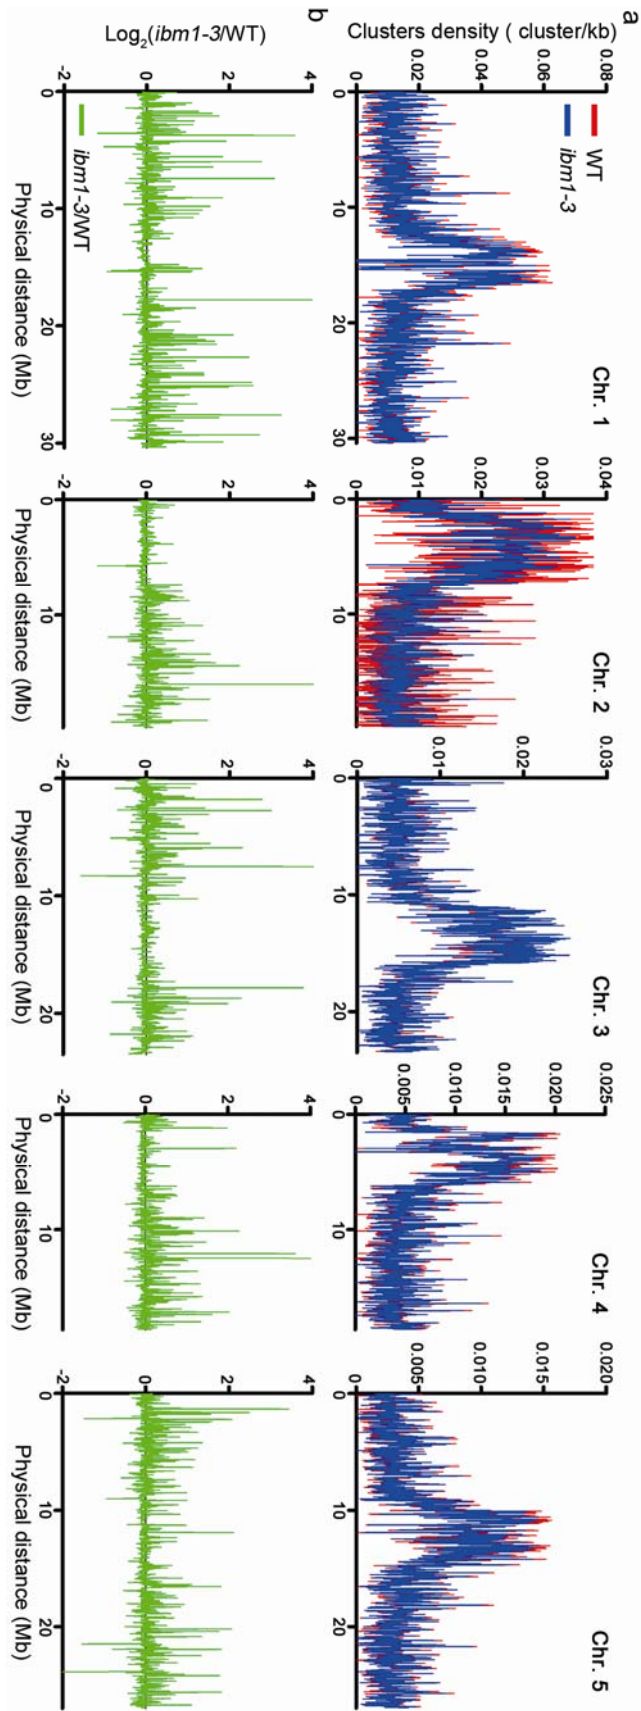

**Supplementary Figure 2.** Global view of the small RNA clusters in *ibm1* and wild-type. Clustered small RNA loci were used to compare the diversity and

conservation of small RNAs between wild type and *ibm1-3*. The densities of small RNA clusters within 50-kb sliding windows with a 25-kb slide were determined along the chromosomes and normalized using the total number of clusters. The number of clusters per kb in the genome is presented. Most of the small RNA clusters accumulated near centromeres, while the variations between wild-type and *ibm1-3* corresponded more closely to euchromosomes.

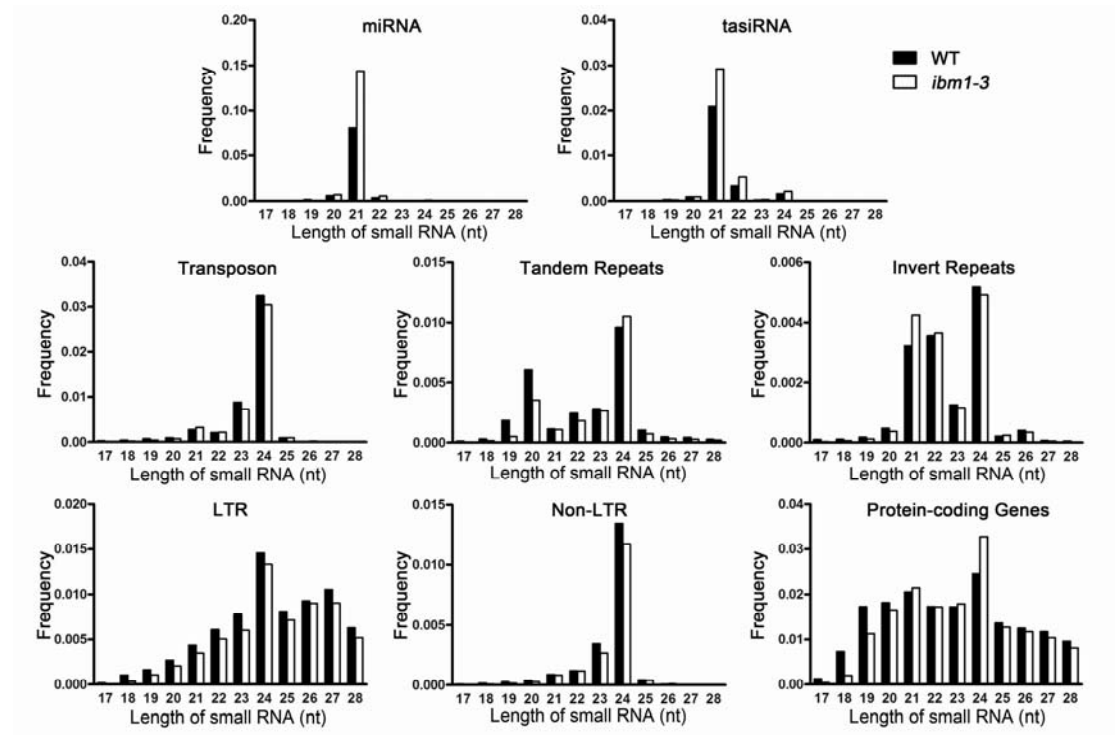

**Supplementary Figure 3.** Size distribution of the miRNAs, tasiRNAs, and small RNAs generated from different locations. The size distribution of different species of small RNAs was compared between wild type and *ibm1-3*. The percentage of reads of a given length from all small RNA reads was calculated. WT: wild-type.

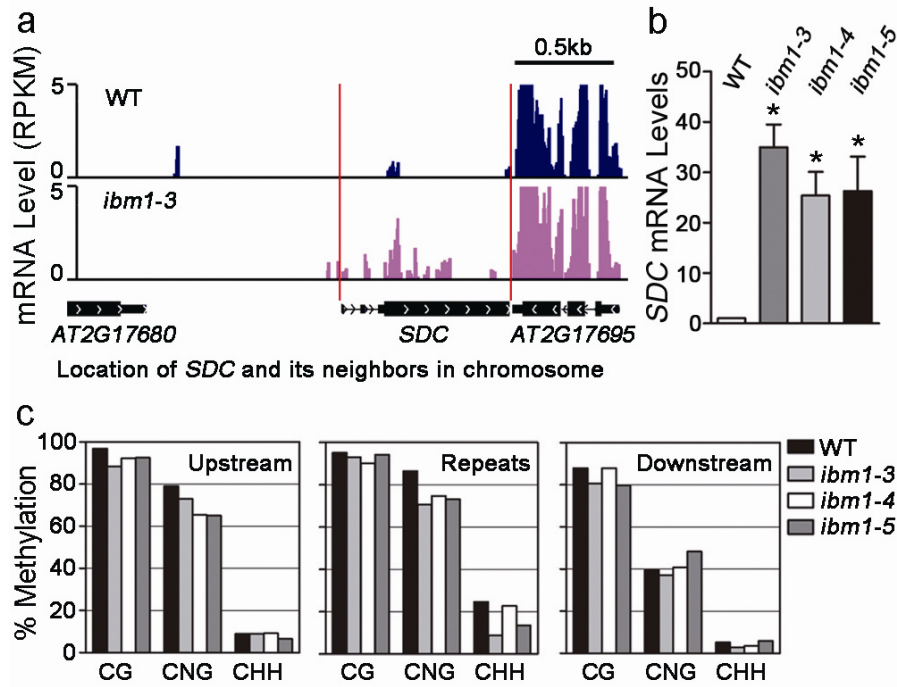

**Supplementary Figure 4.** Transcription and DNA methylation analysis of *SDC* in *ibm1* alleles. **(a)** The mRNA-Seq reads that mapped to *SDC* (*AT2G17690*) were distinctly enriched in *ibm1-3*. The IGV viewer shows the read accumulation in *SDC*, but not in its flanking genes, *AT2G17680* and *AT2G178695*. The X-axis represents the location of *SDC* and its neighbor genes on chromosome II; while the Y-axis represents the RPKM value of mRNA reads by IGV. **(b)** *SDC* expression in the *ibm1* alleles was validated by qPCR. **(c)** Analysis of DNA methylation status in the tandem repeats of *SDC* promoter and in the flanking regions by bisulphate sequencing. WT: wild-type. Asterisks indicate the significant difference using Student's *t* test ( $p < 0.05$ ).

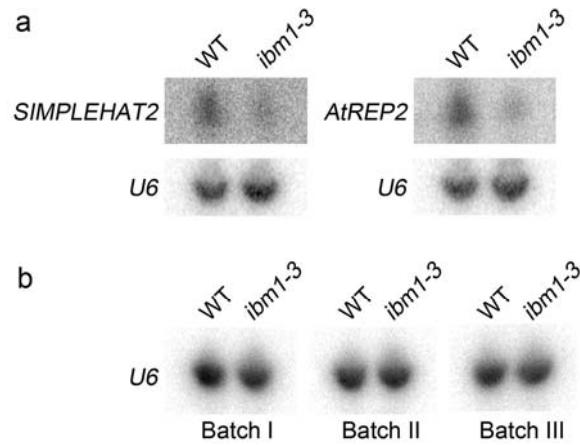

**Supplementary Figure 5.** Northern blot analysis of *SIMPLEHAT2*, *AtREP2*, and *U6* in *ibm1* and wild-type. (a) The siRNA biogenesis for *SIMPLEHAT2* and *AtREP2* are decreased in *ibm1*. Northern blot analysis of endogenous siRNAs at the *SIMPLEHAT2* and *AtREP2* locus in *ibm1-3* and wild type, the *U6* were used as a loading control. The probes for siRNA northern blots for *AtREP2*, *SIMPLEHAT2* and *U6* are listed in Supplementary Table 10. (b) Northern blot analysis of *U6* in three replicates of wild-type and *ibm1-3* plants as the equal loading for quantitative analysis of small RNAs in Figure 6c. WT: wild-type.

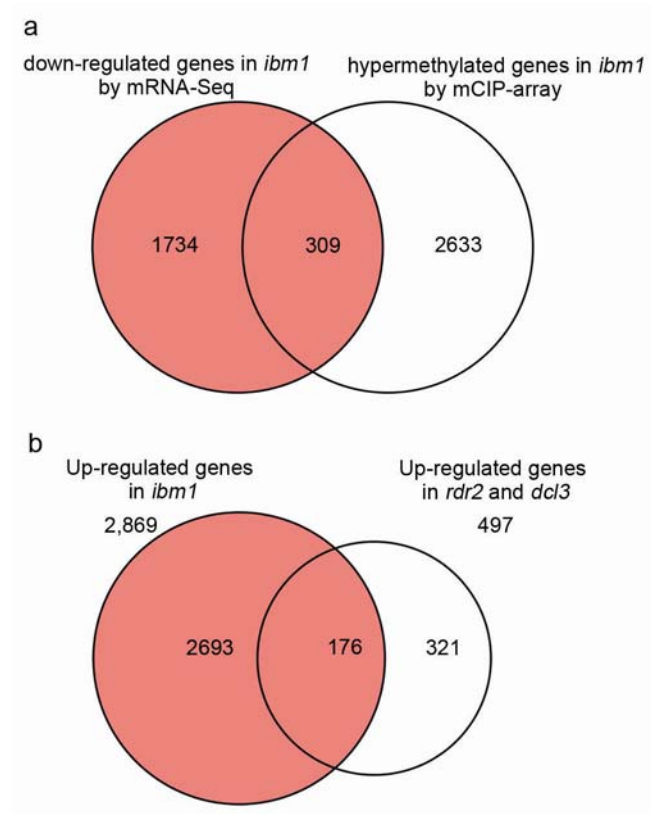

**Supplementary Figure 6.** Comparison of the overlap of genes from different approaches. (a) Diagram of the overlap between the genes significantly decreased in transcription and DNA hypermethylated genes in *ibm1*. The transcriptional profile for IBM1-mediated genes was from Illumina mRNA-Seq in the present work; the DNA methylation data was from Miura et al. *EMBO J.*, 2009, **28**, 1078-1086. (b) Diagram of the overlap between the genes with significantly up-regulated expression in *ibm1*, *rdr2* and *dcl3*. The transcriptional profile in for IBM1-mediated genes was from Illumina mRNA-Seq in the present work; the transcriptional profile for RDR2- and DCL3-mediated genes was from Kasschau et al. *PLoS Biol.*, **5**, e57, 2007.

**Supplementary Table 1.** Summary of the wild-type and *ibm1-3* mRNA-Seq libraries

---

mRNA-Seq libraries

---

|               | Total Reads | Genome<br>Matches | Unique<br>Mapped | Exon       | Intron  | Intregenic |
|---------------|-------------|-------------------|------------------|------------|---------|------------|
| Wild-type     | 17,348,542  | 14,241,086        | 12,388,179       | 12,131,311 | 226,000 | 30,868     |
| <i>ibm1-3</i> | 26,709,084  | 20,105,480        | 16,655,823       | 16,342,263 | 274,136 | 39,424     |
| Total         | 44,057,626  | 34,346,566        | 29,044,002       | 28,473,574 | 500,136 | 70,292     |

---



**Supplementary Table 2.** Summary of the differentially expressed genes in *ibm1-3* and wild-type as determined by mRNA-Seq

|                               | log <sub>2</sub> -fold change > 0.5<br>or < -0.5 | log <sub>2</sub> -fold change > 1<br>or < -1 |
|-------------------------------|--------------------------------------------------|----------------------------------------------|
| Number of up-regulated gene   | 2869                                             | 1335                                         |
| Number of down-regulated gene | 2043                                             | 672                                          |
| Total                         | 4912                                             | 2007                                         |

**Supplementary Table 3.** Gene expression level as determined by mRNA-Seq

| Name        | TAIR Code | Normalized mRNA of WT <sup>a</sup> | Normalized mRNA of <i>ibm1-3</i> <sup>a</sup> | Chisquare. Test | Q-value  | <i>ibm1-3</i> /WT |
|-------------|-----------|------------------------------------|-----------------------------------------------|-----------------|----------|-------------------|
| <i>DCL3</i> | AT3G43920 | 1.69                               | 0.80                                          | 3.48E-06        | 2.52E-05 | 0.47              |
| <i>RDR2</i> | AT4G11130 | 1.53                               | 0.83                                          | 0.00129         | 0.00569  | 0.54              |
| <i>DCL1</i> | AT1G01040 | 4.98                               | 3.65                                          | 1.62E-05        | 0.000105 | 0.73              |
| <i>DCL2</i> | AT3G03300 | 3.98                               | 3.35                                          | 0.0510          | 0.139    | 0.84              |
| <i>DCL4</i> | AT5G20320 | 2.27                               | 2.70                                          | 0.0923          | 0.226    | 1.19              |
| <i>RDR6</i> | AT3G49500 | 4.14                               | 4.86                                          | 0.0838          | 0.211    | 1.17              |
| <i>SDC</i>  | AT2G17690 | 0.23                               | 1.79                                          | 4.93E-06        | 3.47E-05 | 7.78              |

WT: wild-type

a. RPKM value

**Supplementary Table 4.** Bisulfite sequencing of the *RDR2* locus

|                     | CG  |        | CNG |        | Asymmetric |       | Clone No. |
|---------------------|-----|--------|-----|--------|------------|-------|-----------|
| Sites in the region | 9   |        | 6   |        | 22         |       |           |
| Wild-type           | 225 | 85.6 % | 1   | 0.5 %  | 5          | 0.7 % | 31        |
| <i>ibm1-3</i>       | 262 | 80.9 % | 112 | 51.9 % | 46         | 5.8 % | 36        |
| <i>ibm1-4</i>       | 76  | 76.8 % | 22  | 33.3 % | 3          | 1.2 % | 11        |
| <i>ibm1-5</i>       | 244 | 90.4 % | 118 | 65.6 % | 44         | 6.7 % | 30        |

DNA methylation in intragenic region (+2509 to +2702) of *RDR2*

**Supplementary Table 5.** Bisulfite sequencing of the *DCL3* locus

|                     | CG  |        | CNG |        | Asymmetric |        | Clone No. |
|---------------------|-----|--------|-----|--------|------------|--------|-----------|
| Sites in the region | 8   |        | 7   |        | 16         |        |           |
| Wild-type           | 166 | 74.1 % | 2   | 1.0 %  | 0          | 0.0 %  | 28        |
| <i>ibm1-3</i>       | 145 | 69.7 % | 112 | 62.2 % | 55         | 13.2 % | 26        |
| <i>ibm1-4</i>       | 172 | 74.1 % | 109 | 53.7 % | 52         | 11.2 % | 29        |
| <i>ibm1-5</i>       | 164 | 75.9 % | 123 | 65.1 % | 63         | 14.6 % | 27        |

DNA methylation in intragenic region (+4204 to +4396) of *DCL3*

**Supplementary Table 6.** Summary of the small RNA libraries of wild-type and *ibm1-3*

---

Small RNA libraries

---

|               | Total Reads | Genome Matches | Small RNAs <sup>a</sup> | Unique Mapped | Multiple Mapped |
|---------------|-------------|----------------|-------------------------|---------------|-----------------|
| Wild-type     | 24,911,693  | 21,461,549     | 5,088,056               | 2,310,925     | 2,777,131       |
| <i>ibm1-3</i> | 24,845,025  | 22,014,858     | 6,562,528               | 3,195,421     | 3,367,107       |
| Total         | 49,756,718  | 43,476,407     | 11,650,584              | 5,506,346     | 6,144,238       |

---

a. After eliminating tRNA, rRNA, snRNA and snoRNA matched reads from all genome matched ones.

**Supplementary Table 7.** Bisulfite sequencing of the tandem repeats in *SDC*

| Upstream            |     |        |     |        |            |        |           |
|---------------------|-----|--------|-----|--------|------------|--------|-----------|
|                     | CG  |        | CNG |        | Asymmetric |        | Clone No. |
| Sites in the region | 4   |        | 1   |        | 20         |        |           |
| Wild-type           | 93  | 96.9 % | 19  | 79.2 % | 43         | 9.0 %  | 24        |
| <i>ibm1-3</i>       | 88  | 88.0 % | 18  | 72.0 % | 44         | 8.8 %  | 25        |
| <i>ibm1-5</i>       | 74  | 92.5 % | 13  | 65.0 % | 26         | 6.5 %  | 20        |
| Repeats             |     |        |     |        |            |        |           |
| Sites in the region | 7   |        | 9   |        | 15         |        |           |
| Wild-type           | 160 | 95.2%  | 187 | 86.6 % | 89         | 24.7 % | 24        |
| <i>ibm1-3</i>       | 163 | 93.1 % | 159 | 70.7 % | 33         | 8.8 %  | 25        |
| <i>ibm1-5</i>       | 132 | 94.3 % | 133 | 73.9 % | 41         | 13.7 % | 20        |
| Downstream          |     |        |     |        |            |        |           |
| Sites in the region | 4   |        | 6   |        | 39         |        |           |
| Wild-type           | 95  | 88.0 % | 64  | 39.5 % | 55         | 5.2 %  | 27        |
| <i>ibm1-3</i>       | 58  | 80.6 % | 40  | 37.0 % | 20         | 2.9 %  | 18        |
| <i>ibm1-5</i>       | 67  | 79.8 % | 61  | 48.4 % | 49         | 6.0 %  | 21        |

DNA methylation in *SDC* tandem repeats (-954 to -731), upstream (-1101 to -955) and downstream (-657 to -443) regions of repeats

**Supplementary Table 8.** Bisulfite sequencing of indirect targets of IBM1

| <b><i>AT1G28135</i></b> |     |         |     |        |            |        |           |
|-------------------------|-----|---------|-----|--------|------------|--------|-----------|
|                         | CG  |         | CNG |        | Asymmetric |        | Clone No. |
| Sites in the region     | 13  |         | 7   |        | 41         |        |           |
| Wild-type               | 183 | 82.8 %  | 73  | 61.3 % | 236        | 33.9 % | 17        |
| <i>ibm1-3</i>           | 202 | 77.7 %  | 46  | 32.9 % | 100        | 12.2 % | 20        |
| <b><i>AT1G31580</i></b> |     |         |     |        |            |        |           |
| Sites in the region     | 12  |         | 11  |        | 16         |        |           |
| Wild-type               | 236 | 98.3 %  | 139 | 63.2 % | 64         | 20.0 % | 20        |
| <i>ibm1-3</i>           | 158 | 87.8 %  | 84  | 50.9 % | 17         | 7.1 %  | 15        |
| <b><i>AT1G33370</i></b> |     |         |     |        |            |        |           |
| Sites in the region     | 3   |         | 2   |        | 21         |        |           |
| Wild-type               | 38  | 84.4 %  | 16  | 53.3 % | 114        | 36.2 % | 15        |
| <i>ibm1-3</i>           | 40  | 74.1 %  | 18  | 50.0 % | 134        | 32.8 % | 18        |
| <b><i>AT2G01422</i></b> |     |         |     |        |            |        |           |
| Sites in the region     | 6   |         | 13  |        | 42         |        |           |
| Wild-type               | 70  | 97.2 %  | 110 | 70.5 % | 92         | 18.3 % | 12        |
| <i>ibm1-3</i>           | 42  | 87.5 %  | 53  | 51.0 % | 6          | 1.8 %  | 8         |
| <b><i>AT2G13431</i></b> |     |         |     |        |            |        |           |
| Sites in the region     | 5   |         | 7   |        | 33         |        |           |
| Wild-type               | 72  | 72.0 %  | 49  | 35.0 % | 51         | 7.7 %  | 20        |
| <i>ibm1-3</i>           | 42  | 64.6 %  | 15  | 16.5 % | 13         | 3.0 %  | 13        |
| <b><i>AT3G29639</i></b> |     |         |     |        |            |        |           |
| Sites in the region     | 2   |         | 1   |        | 26         |        |           |
| Wild-type               | 37  | 97.4 %  | 10  | 52.6 % | 155        | 31.4 % | 19        |
| <i>ibm1-3</i>           | 16  | 88.9 %  | 2   | 22.2 % | 48         | 20.5 % | 9         |
| <b><i>AT3G50480</i></b> |     |         |     |        |            |        |           |
| Sites in the region     | 7   |         | 3   |        | 59         |        |           |
| Wild-type               | 133 | 100.0 % | 49  | 86.0 % | 877        | 78.2 % | 19        |
| <i>ibm1-3</i>           | 116 | 97.5 %  | 42  | 82.3 % | 726        | 72.4 % | 17        |
| <b><i>AT4G04293</i></b> |     |         |     |        |            |        |           |
| Sites in the region     | 1   |         | 5   |        | 28         |        |           |
| Wild-type               | 16  | 84.2 %  | 40  | 42.1 % | 65         | 12.2 % | 19        |
| <i>ibm1-3</i>           | 12  | 92.3 %  | 19  | 29.2 % | 22         | 6.0 %  | 13        |

**Supplementary Table 9.** Overlap of the increased siRNAs and DNA hypermethylation in *ibm1*

| Group                       | Region     | 24-nt siRNA<br>of WT <sup>a</sup> | 24-nt siRNA<br>of <i>ibm1-3</i> <sup>a</sup> | <i>ibm1-3</i> /WT |
|-----------------------------|------------|-----------------------------------|----------------------------------------------|-------------------|
| All protein-coding<br>genes | Promoter   | 8.73                              | 8.03                                         | 0.92              |
|                             | Gene Body  | 3.42                              | 3.63                                         | 1.06              |
|                             | Downstream | 6.16                              | 6.13                                         | 0.99              |
| Hypermethylated genes       | Promoter   | 10.39                             | 10.00                                        | 0.96              |
|                             | Gene Body  | 0.88                              | 3.03                                         | 3.46*             |
|                             | Downstream | 4.22                              | 4.99                                         | 1.18              |

a. RPKM

Asterisks indicate  $p < 0.01$

WT: wild-type

The siRNAs data is from the present work, and DNA methylation data is from Miura *et al.* *EMBO J.*, 2009, **28**, 1078-1086.



**Supplementary Table 10. Primers used in this work**

| <b>Name</b> | <b>Sequence</b>                         | <b>Employ</b>                                        |
|-------------|-----------------------------------------|------------------------------------------------------|
| IBM1-3TF    | GAGAAGGAAGTTGAGGCCAAAATATACG            | T-DNA identification in <i>ibm1-3</i> , pair to LBb1 |
| IBM1-3F     | CGTTATTATTGGATATACTGCATTAAT             | Identification of <i>ibm1-3</i>                      |
| IBM1-3R     | CAAGCCATTAGATAAATACGAGTATAAG            |                                                      |
| IBM1-4F     | CTTGTTGATTTCTACCTCAATGACTCT             | Identification of <i>ibm1-4</i>                      |
| IBM1-4R     | ATCAAAACAGCATCACCAAGCTTCTGATT           |                                                      |
| IBM1-5F     | GTGGACTCTTTCGTTGAACTCCTCTTTTTC          | Identification of <i>ibm1-5</i>                      |
| IBM1-5R     | GGAAGCTCAACTGGCAGCAACT                  |                                                      |
| NRPD1A-ReF  | GACTTGTGAAGATGGTCTGCAGTTG               | qPCR                                                 |
| NRPD1A-ReR  | GTCTTCGAATGTCCCGTCTATTCTTAC             |                                                      |
| RDR2-ReF    | TGGCGAGAGATAACCGGAGGTATG                | qPCR                                                 |
| RDR2-ReR    | CTTCTCATCGCGATGGTTTGGATTG               |                                                      |
| DCL3-ReF    | GCCTACTTTCGATACCTCGGAAGA                | qPCR                                                 |
| DCL3-ReR    | GCATACATCACAGCCTCACGATTG                |                                                      |
| AGO4-ReF    | CACTCGCTCTCCTATGTGTACCAAAG              | qPCR                                                 |
| AGO4-ReR    | CATGGCTTGATGATGTCTCAGACTGATC            |                                                      |
| AtSDC-ReF   | CATCGTGTCTAGTGATCGGCATC                 | qPCR                                                 |
| AtSDC-ReR   | CAGCGTAAGTAAGACCTTCGTCAAG               |                                                      |
| IBM1-ReF    | GTTAAGAAGATGATAGTCCATGCAGTTG            | qPCR and RT-RCP                                      |
| IBM1-ReR    | TGATATCTCCTCTTCAGCTGCTTC                | qPCR and RT-RCP                                      |
| IBM1-NS     | CGGGATCCATGGATTCTGTGGAGGAAGAAGGTG       | for 35S::YFP::IBM1                                   |
| IBM1-CAS    | GCGTCGACCTACATCTTCTCCATTTCTAATCTGTCAATG | construct                                            |
| RDR2-P1-F   | TGGCGATAGAGAAGATTGTGGAAG                | ChIP                                                 |
| RDR2-P1-R   | GCAGAGGTAATAAAACGGTAAACTAG              |                                                      |
| RDR2-P2-F   | CAGAGCTACTTTCGCAAGATTGATGA              | ChIP                                                 |
| RDR2-P2-R   | CAAGAACTCTAATATCTCCAGGGTGAA             |                                                      |
| RDR2-P3-F   | AGCGAGGACACGGTAGCTTATG                  | ChIP                                                 |
| RDR2-P3-R   | CGTTAGCAGCTCCATAGTATATCATC              |                                                      |
| RDR2-P4-F   | AGACGAACTCTGTCCGGAACTAAG                | ChIP                                                 |
| RDR2-P4-R   | CCAAGTGTACTTTGGGATTGGTTG                |                                                      |
| RDR2-P5-F   | GTAGGGCATGTGACAGAATAACCA                | ChIP                                                 |
| RDR2-P5-R   | GCATTTTCATCTTCATTTGACACC                |                                                      |
| DCL3-P1a-F  | CGTGTGTCAGAATGTGTTAAATTG                | ChIP                                                 |
| DCL3-P1a-R  | CTCTCTATTCACCAAGAAAACAGTGT              |                                                      |
| DCL3-P1-F   | CATCCAAACTCGGAACATACATTG                | ChIP                                                 |
| DCL3-P1-R   | TATCCGGGTAATCTGGTAGAAATGTAC             |                                                      |
| DCL3-P2-F   | GAGAGAATTATAACTGCGAAAGTGATC             | ChIP                                                 |
| DCL3-P2-R   | AAGAACAGGTAACCTTGCCATG                  |                                                      |
| DCL3-P3-F   | TATGAGTGATCCTCCTAGCAGAAATG              | ChIP                                                 |
| DCL3-P3-R   | CGACACCAGCTAATTGACGAATTA                |                                                      |
| DCL3-P4-F   | CGTAAGCGATTCTTCTGCTATGA                 | ChIP                                                 |

|                |                                      |                                  |
|----------------|--------------------------------------|----------------------------------|
| DCL3-P4-R      | CAATCCCATACCTGATTA AAAAGGGAA         |                                  |
| DCL3-P5-F      | ACCGAATATCCATGCGCATTG                | ChIP                             |
| DCL3-P5-R      | CTAAGCTGGCTGGCCAACATTA               |                                  |
| DCL3-P6-F      | TGGATTGTCTGCTTCTCTCCATATG            | ChIP                             |
| DCL3-P6-R      | TTCTCTCCA ACTCTATGAGCTCATC           |                                  |
| DCL3-P7-F      | TGAGTTTTGCAAGAAGCATCTGTG             | ChIP                             |
| DCL3-P7-R      | GACTCGGGATACATGAGAGCAGA              |                                  |
| DCL3-P8-F      | GCTCATAGACATTACTACAGTTGAAG           | ChIP                             |
| DCL3-P8-R      | TCGAGGCACAGTGAAAAGCTC                |                                  |
| DCL3-Bisu-F    | GGATAGTGATGGGAATTAGTGTAATATTT        | Bisulfite analysis               |
| DCL3-Bisu-R    | TAAAACATCCACCTCAAAAAAACTC            |                                  |
| RDR2-Bisu-F    | TTTGGAGTATGGTTAAGTGATGTT             | Bisulfite analysis               |
| RDR2-Bisu-R    | TACTTTTCTCCCTTCTAAAAAAA              |                                  |
| SDC-Bisu-F1    | TAAGTTTTATTATTTGGATTTAAAGYGGATAATAT  | Bisulfite analysis of <i>SDC</i> |
| SDC-Bisu-R1    | AATCTCTAAAATTTTTTTTATTTTACTCATTCTAC  | upstream and repeats regions     |
| SDC-Bisu-F2    | GTATAGAGGTTTTAAAGTAGAATGAGTAAAAT     | Bisulfite analysis of <i>SDC</i> |
| SDC-Bisu-R2    | ACATTTATATCRATAAATTTTAATCRAAAAATATAT | downstream region                |
| AT1G28135-BS1F | TGTTAAATATATTTTTGAAYYAGATTGG         | Bisulfite analysis               |
| AT1G28135-BS1R | CCACATTACCRTTTTTRATTCRATCAA ACTT     |                                  |
| AT1G31580-BS1F | AAGAAAGAYAAGGTTGAAAGAGAGTAA          | Bisulfite analysis               |
| AT1G31580-BS1R | CAATCTAAAATACTTTATTCCRCCAACACTTA     |                                  |
| AT1G33370-BS1F | ATGATATGTTTATGAATTATTGTYTAAATATTTTG  | Bisulfite analysis               |
| AT1G33370-BS1R | AACAATCTACATATACATTTTTTRCARCCATTTTAT |                                  |
| AT2G01422-BS3F | GGYTTTcTYAGYAYCGGAAYCGAAGT           | Bisulfite analysis               |
| AT2G01422-BS3R | ATAAAACCATCATCCARARACCCAAA           |                                  |
| AT2G13431-BS1F | TGTTTGGTGATTATAGYTTYTTTTG            | Bisulfite analysis               |
| AT2G13431-BS1R | AAAACCAATCAARCTCTTAACRCAAATTCAA      |                                  |
| AT3G29639-BS2F | TAAGGGTGATGTATGTTTGGAAGT             | Bisulfite analysis               |
| AT3G29639-BS2R | TATTATTGCATAAAAATGACAAACAACAATTAT    |                                  |
| AT3G50480-BS1F | GAATAAAGATGGATGYYYATTATAAGG          | Bisulfite analysis               |
| AT3G50480-BS1R | TTCTCTTCTTTAACRATTTTCTTTRTARAATCATT  |                                  |
| AT4G04293-BS1F | YAGGTAAGGGGAAATATTGGGT               | Bisulfite analysis               |
| AT4G04293-BS1R | CTCCRATCATCTARATRCTCATTTTCA          |                                  |
| AT1G28135F     | AGTTGATTACGTTGCTCTCGC                | qPCR                             |
| AT1G28135R     | TTTCTTGCCCTGAGCCCTG                  |                                  |
| AT1G31580F     | ATTGTCCCATTTCATGTTCC                 | qPCR                             |
| AT1G31580R     | TCAGTGACTTGGTGAGTTTTTTTG             |                                  |
| AT1G33370F     | GCACCAATGGTTCAGTGGTAG                | qPCR                             |
| AT1G33370R     | TACACCGTCTGGGATCGAA                  |                                  |
| AT2G01422F     | ATCCATCCAAGGCAGAAGC                  | qPCR                             |
| AT2G01422R     | GAGTGAGAGCCTCATGAAGGA                |                                  |
| AT2G13431F     | CTTTTACCCAGGTGAGCAAAC                | qPCR                             |
| AT2G13431R     | CAAGCTCTTAACGCAAATTCAAG              |                                  |

---

|            |                              |            |
|------------|------------------------------|------------|
| AT3G29639F | TGGAAACCAGAAAGCAAAGAG        | qPCR       |
| AT3G29639R | CCACAGACACAGAAACTCATATACAG   |            |
| AT3G50480F | CGATAGAACTTGAATTAGTAAGGGTAGC | qPCR       |
| AT3G50480R | CGACTTGTATCGCCTTCATTTTC      |            |
| AT4G04293F | GACGACTACTTCACCCAACGTG       | qPCR       |
| AT4G04293R | CAGAATCTACGCAAGCACTCTAATG    |            |
| AT1G33370  | AACGTACTGCCAAACCCGTCCCGC     | siRNA qPCR |
| AT2G01422  | AGGCGGCGGCTGAAGTTTTAGAGA     | siRNA qPCR |
| AT4G04293  | AATGAGCATCTAGATGATCGGAGC     | siRNA qPCR |

---
